# Supplementary material for: Variation in Post-Transplant Cancer Incidence among Italian Kidney Transplant Recipients over a 25-Year Period
Source: MDPI journal article supplement (doi:10.3390/cancers15041347), 2023-02-20
Supplement: s1 [file s1]

**Supplementary Table S1.** Cancer site and group definitions by the International Classification of Diseases and Related Health Problems, 10th revision (ICD-10).

| Site/group name                  | ICD-10 code                              |
|----------------------------------|------------------------------------------|
| All                              | C00-C97, D09.0, D30.3, D41.4             |
| All but NMSC                     | C00-C97 (excl. C44), D09.0, D30.3, D41.4 |
| Solid tumors                     | C00-C80 (excl. C44, C46)                 |
| Head and neck                    | C00-14, C30-32                           |
| Lip                              | C00                                      |
| Salivary glands                  | C07-08                                   |
| Esophagus                        | C15                                      |
| Stomach                          | C16                                      |
| Colon-rectum-anus                | C18-21                                   |
| Liver                            | C22                                      |
| Pancreas                         | C25                                      |
| Bronchus and lung                | C34                                      |
| Skin melanoma                    | C43                                      |
| NMSC                             | C44                                      |
| Mesothelioma                     | C45                                      |
| Kaposi's sarcoma                 | C46                                      |
| Other connective and soft tissue | C49                                      |
| Breast                           | C50                                      |
| Corpus uteri                     | C54-55                                   |
| Ovary                            | C56                                      |
| Prostate                         | C61                                      |
| Testis                           | C62                                      |
| Kidney                           | C64                                      |
| Bladder                          | C67, D09.0, D30.3, D41.4                 |
| Brain                            | C71                                      |
| Thyroid gland                    | C73                                      |
| Unspecified sites                | C76-80                                   |
| PTLD                             | C81-96                                   |
| Hodgkin lymphoma                 | C81                                      |
| Non-Hodgkin lymphoma             | C82-85, C96                              |
| Multiple myeloma                 | C90                                      |
| Leukaemia                        | C91-95                                   |

Abbreviations: NMSC, nonmelanoma skin cancer; PTLD, posttransplant lymphoproliferative diseases.
